# Supplementary material
Source: PubMed Central journal article supplement (PMC7584160)
Supplement: ehp6498.s001.acco.pdf [file ehp6498.s001.acco.pdf]

**Note to readers with disabilities:** *EHP* strives to ensure that all journal content is accessible to all readers. However, some figures and Supplemental Material published in *EHP* articles may not conform to [508 standards](#) due to the complexity of the information being presented. If you need assistance accessing journal content, please contact [ehp508@niehs.nih.gov](mailto:ehp508@niehs.nih.gov). Our staff will work with you to assess and meet your accessibility needs within 3 working days.

### **Supplemental Material**

#### **Binding and Activity of Tetrabromobisphenol A Mono-Ether Structural Analogs to Thyroid Hormone Transport Proteins and Receptors**

Xiao-Min Ren, Linlin Yao, Qiao Xue, Jianbo Shi, Qinghua Zhang, Pu Wang, Jianjie Fu, Aiqian Zhang, Guangbo Qu, and Guibin Jiang

#### **Table of Contents**

**Figure S1.** Cytotoxicity of the tetrabromobisphenol A (TBBPA) mono-ether structural analogs [TBBPA-mono(glycidyl ether) (TBBPA-MGE), TBBPA-mono(allyl ether) (TBBPA-MAE) and TBBPA-mono(2,3-dibromopropyl ether) (TBBPA-MDBPE)], the TBBPA bis-ether derivatives [TBBPA-bis(glycidyl ether) (TBBPA-BGE), TBBPA-bis(allyl ether) (TBBPA-BAE) and TBBPA-bis(2,3-dibromopropyl ether) (TBBPA-BDBPE)] and TBBPA determined by Cell Counting Kit-8 (CCK-8) assay. GH3 cells were treated with different concentrations of the tested chemicals. Three replicated wells were included for each group in a 96-well plate. The error bar represents the standard deviation of three replicates. \*  $p < 0.05$ , compared with cell samples of the control group (0.1% dimethyl sulfoxide). The  $p$  values of the experimental data were analyzed using one-way analysis of variance (ANOVA), followed by a least significant difference multiple comparisons test (IBM SPSS Statistics 20). See the summary data in Table S1.

**Figure S2.** Competitive binding curves of the tetrabromobisphenol A (TBBPA) mono-ether structural analogs [TBBPA-mono(glycidyl ether) (TBBPA-MGE), TBBPA-mono(allyl ether) (TBBPA-MAE) and TBBPA-mono(2,3-dibromopropyl ether) (TBBPA-MDBPE)], the TBBPA bis-ether derivatives [TBBPA-bis(glycidyl ether) (TBBPA-BGE), TBBPA-bis(allyl ether) (TBBPA-BAE) and TBBPA-bis(2,3-dibromopropyl ether) (TBBPA-BDBPE)] and TBBPA with thyroxine-binding globulin (TBG). Three replicate wells were conducted for each group in a 96-well plate. Error bars represent the standard deviation of three replicates. \* $p < 0.05$ , compared with the control group (1% dimethyl sulfoxide). The  $p$  values of the experimental data were analyzed using one-way analysis of variance (ANOVA), followed by a least significant difference multiple comparisons test (IBM SPSS Statistics 20). See the summary data in Table S3.

**Figure S3.** The interactions of tetrabromobisphenol A (TBBPA) mono-ether structural analogs [TBBPA-mono(glycidyl ether) (TBBPA-MGE), TBBPA-mono(allyl ether) (TBBPA-MAE) and TBBPA-mono(2,3-dibromopropyl ether) (TBBPA-MDBPE)] and TBBPA with transthyretin (TTR).

**Figure S4.** Competitive binding curves of the tetrabromobisphenol A (TBBPA) mono-ether structural analogs [TBBPA-mono(glycidyl ether) (TBBPA-MGE), TBBPA-mono(allyl ether) (TBBPA-MAE) and TBBPA-mono(2,3-dibromopropyl ether) (TBBPA-MDBPE)], the TBBPA bis-ether derivatives [TBBPA-bis(glycidyl ether) (TBBPA-BGE), TBBPA-bis(allyl ether) (TBBPA-BAE) and TBBPA-bis(2,3-dibromopropyl ether) (TBBPA-BDBPE)] and TBBPA with thyroid hormone receptor  $\beta$ -ligand binding domain (TR $\beta$ -LBD). Three replicate wells were conducted for each group in a 96-well plate. Error bars represent the standard deviation of three replicates. \*  $p < 0.05$ , compared with the control group (1% dimethyl sulfoxide). The  $p$  values of the experimental data were analyzed using one-way analysis of variance (ANOVA), followed by a least significant difference multiple comparisons test (IBM SPSS Statistics 20). See the summary data in Table S6.

**Figure S5.** Overlay of the binding modes of the tetrabromobisphenol A (TBBPA) mono-ether structural analogs [TBBPA-mono(glycidyl ether) (TBBPA-MGE), TBBPA-mono(allyl ether) (TBBPA-MAE) and TBBPA-mono(2,3-dibromopropyl ether) (TBBPA-MDBPE)] with TBBPA in human thyroid hormone receptor  $\beta$ -ligand binding domain (TR $\beta$ -LBD). The protein is shown in green. TBBPA is shown in blue. TBBPA mono-ether structural analogs are shown in gray.

**Figure S6.** The interactions of tetrabromobisphenol A (TBBPA) mono-ether structural analogs [TBBPA-mono(glycidyl ether) (TBBPA-MGE), TBBPA-mono(allyl ether) (TBBPA-MAE) and TBBPA-mono(2,3-dibromopropyl ether) (TBBPA-MDBPE)] and TBBPA with thyroid hormone receptor  $\alpha$ -ligand binding domain (TR $\alpha$ -LBD).

**Figure S7.** The interactions of tetrabromobisphenol A (TBBPA) mono-ether structural analogs [TBBPA-mono(glycidyl ether) (TBBPA-MGE), TBBPA-mono(allyl ether) (TBBPA-MAE) and TBBPA-mono(2,3-dibromopropyl ether) (TBBPA-MDBPE)] and TBBPA with thyroid hormone receptor  $\beta$ -ligand binding domain (TR $\beta$ -LBD).

**Table S1.** Summary data for Figure S1. “SD” means standard deviation of three replicates.

**Table S2.** Summary data for Figure 2. “RBP” means relative binding potency. “SD” means standard deviation of three replicates.

**Table S3.** Summary data for Figure S2. “RBP” means relative binding potency. “SD” means standard deviation of three replicates.

**Table S4.** The results of docking scores and interactions of tetrabromobisphenol A (TBBPA) mono-ether structural analogs [TBBPA-mono(glycidyl ether) (TBBPA-MGE), TBBPA-mono(allyl ether) (TBBPA-MAE) and TBBPA-mono(2,3-dibromopropyl ether) (TBBPA-MDBPE)] and TBBPA with transthyretin (TTR).

**Table S5.** Summary data for Figure 4. “RBP” means relative binding potency. “SD” means standard deviation of three replicates.

**Table S6.** Summary data for Figure S4. “RBP” means relative binding potency. “SD” means standard deviation of three replicates.

**Table S7.** The results of docking scores and interactions of tetrabromobisphenol A (TBBPA) mono-ether structural analogs [TBBPA-mono(glycidyl ether) (TBBPA-MGE), TBBPA-mono(allyl ether) (TBBPA-MAE) and TBBPA-mono(2,3-dibromopropyl ether) (TBBPA-MDBPE)] and TBBPA with thyroid hormone receptor  $\alpha$ -ligand binding domain (TR $\alpha$ -LBD).

**Table S8.** The results of docking scores and interactions of tetrabromobisphenol A (TBBPA) mono-ether structural analogs [TBBPA-mono(glycidyl ether) (TBBPA-MGE), TBBPA-mono(allyl ether) (TBBPA-MAE) and TBBPA-mono(2,3-dibromopropyl ether) (TBBPA-MDBPE)] and TBBPA with thyroid hormone receptor  $\beta$ -ligand binding domain (TR $\beta$ -LBD).

**Table S9.** Summary data for Figure 5. “RCP” means relative cell proliferation compared with dimethyl sulfoxide control group. “SD” means standard deviation of three replicates.

**Table S10.** Summary data for Figure 6. “RCP” means relative cell proliferation compared with dimethyl sulfoxide control group. “SD” means standard deviation of three replicates.

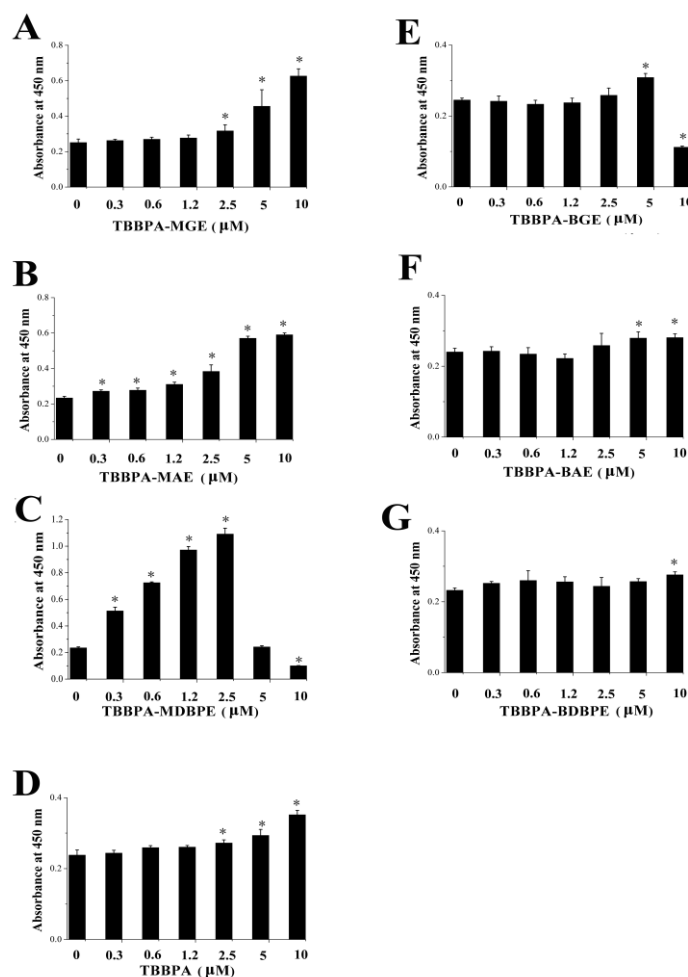

**Figure S1.** Cytotoxicity of the tetrabromobisphenol A (TBBPA) mono-ether structural analogs [TBBPA-mono(glycidyl ether) (TBBPA-MGE), TBBPA-mono(allyl ether) (TBBPA-MAE) and TBBPA-mono(2,3-dibromopropyl ether) (TBBPA-MDBPE)], the TBBPA bis-ether derivatives [TBBPA-bis(glycidyl ether) (TBBPA-BGE), TBBPA-bis(allyl ether) (TBBPA-BAE) and TBBPA-bis(2,3-dibromopropyl ether) (TBBPA-BDBPE)] and TBBPA determined by Cell Counting Kit-8 (CCK-8) assay. GH3 cells were treated with different concentrations of the tested chemicals. Three replicated wells were included for each group in a 96-well plate. The error bar represents the standard deviation of three replicates. \*  $p < 0.05$ , compared with cell samples of the control group (0.1% dimethyl sulfoxide). The  $p$  values of the experimental data were analyzed using one-way analysis of variance (ANOVA), followed by a least significant difference multiple comparisons test (IBM SPSS Statistics 20). See the summary data in Table S1.

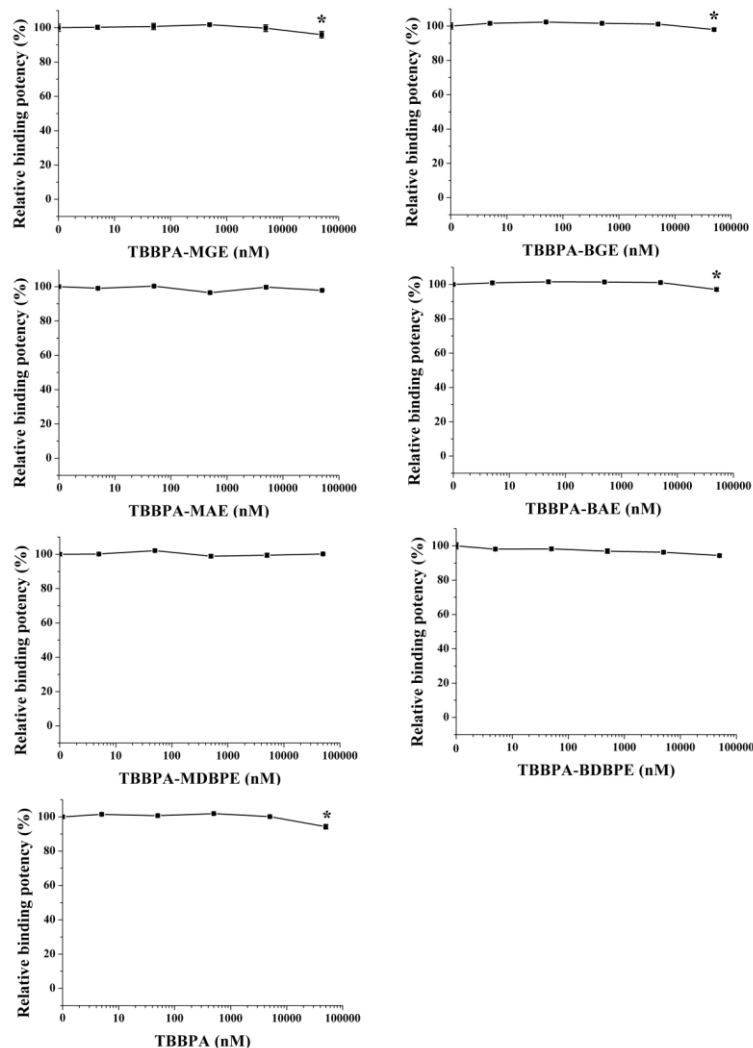

**Figure S2.** Competitive binding curves of the tetrabromobisphenol A (TBBPA) mono-ether structural analogs [TBBPA-mono(glycidyl ether) (TBBPA-MGE), TBBPA-mono(allyl ether) (TBBPA-MAE) and TBBPA-mono(2,3-dibromopropyl ether) (TBBPA-MDBPE)], the TBBPA bis-ether derivatives [TBBPA-bis(glycidyl ether) (TBBPA-BGE), TBBPA-bis(allyl ether) (TBBPA-BAE) and TBBPA-bis(2,3-dibromopropyl ether) (TBBPA-BDBPE)] and TBBPA with thyroxine-binding globulin (TBG). Three replicate wells were conducted for each group in a 96-well plate. Error bars represent the standard deviation of three replicates. \* $p < 0.05$ , compared with the control group (1% dimethyl sulfoxide). The  $p$  values of the experimental data were analyzed using one-way analysis of variance (ANOVA), followed by a least significant difference multiple comparisons test (IBM SPSS Statistics 20). See the summary data in Table S3.

### A: TBBPA

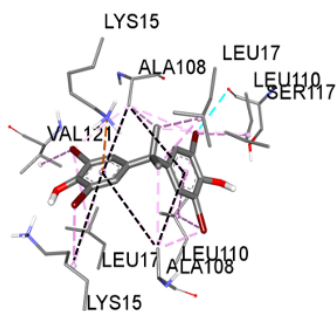

### B: TBBPA-MGE

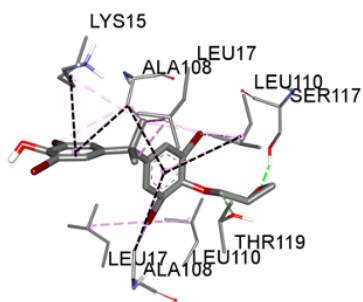

### C: TBBPA-MAE

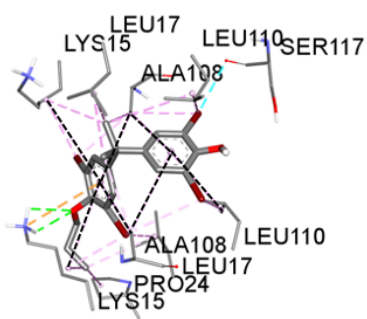

### D: TBBPA-MDBPE

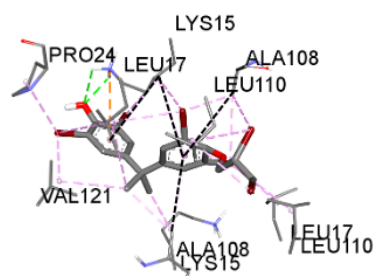

### Interactions

|                                                                                     |                            |                                                                                     |          |                                                                                       |                   |
|-------------------------------------------------------------------------------------|----------------------------|-------------------------------------------------------------------------------------|----------|---------------------------------------------------------------------------------------|-------------------|
|  | Conventional Hydrogen Bond |  | Alkyl    |  | Attractive Charge |
|  | Halogen                    |  | Pi-Alkyl |                                                                                       |                   |

**Figure S3.** The interactions of tetrabromobisphenol A (TBBPA) mono-ether structural analogs [TBBPA-mono(glycidyl ether) (TBBPA-MGE), TBBPA-mono(allyl ether) (TBBPA-MAE) and TBBPA-mono(2,3-dibromopropyl ether) (TBBPA-MDBPE)] and TBBPA with transthyretin (TTR).

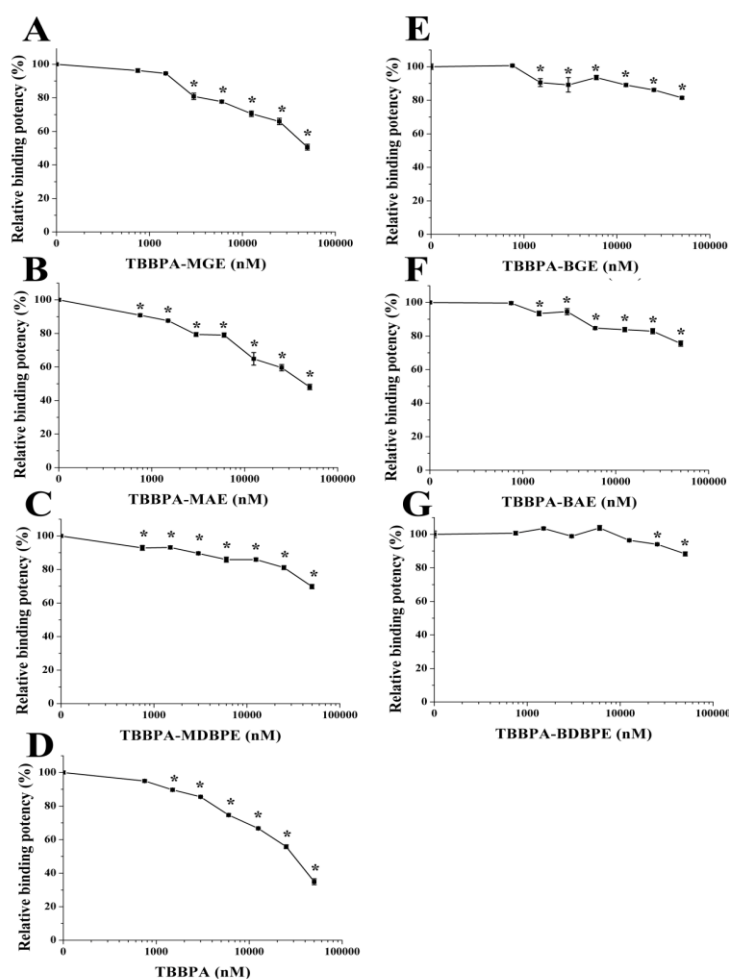

**Figure S4.** Competitive binding curves of the tetrabromobisphenol A (TBBPA) mono-ether structural analogs [TBBPA-mono(glycidyl ether) (TBBPA-MGE), TBBPA-mono(allyl ether) (TBBPA-MAE) and TBBPA-mono(2,3-dibromopropyl ether) (TBBPA-MDBPE)], the TBBPA bis-ether derivatives [TBBPA-bis(glycidyl ether) (TBBPA-BGE), TBBPA-bis(allyl ether) (TBBPA-BAE) and TBBPA-bis(2,3-dibromopropyl ether) (TBBPA-BDBPE)] and TBBPA with thyroid hormone receptor  $\beta$ -ligand binding domain (TR $\beta$ -LBD). Three replicate wells were conducted for each group in a 96-well plate. Error bars represent the standard deviation of three replicates. \*  $p < 0.05$ , compared with the control group (1% dimethyl sulfoxide). The  $p$  values of the experimental data were analyzed using one-way analysis of variance (ANOVA), followed by a least significant difference multiple comparisons test (IBM SPSS Statistics 20). See the summary data in Table S6.

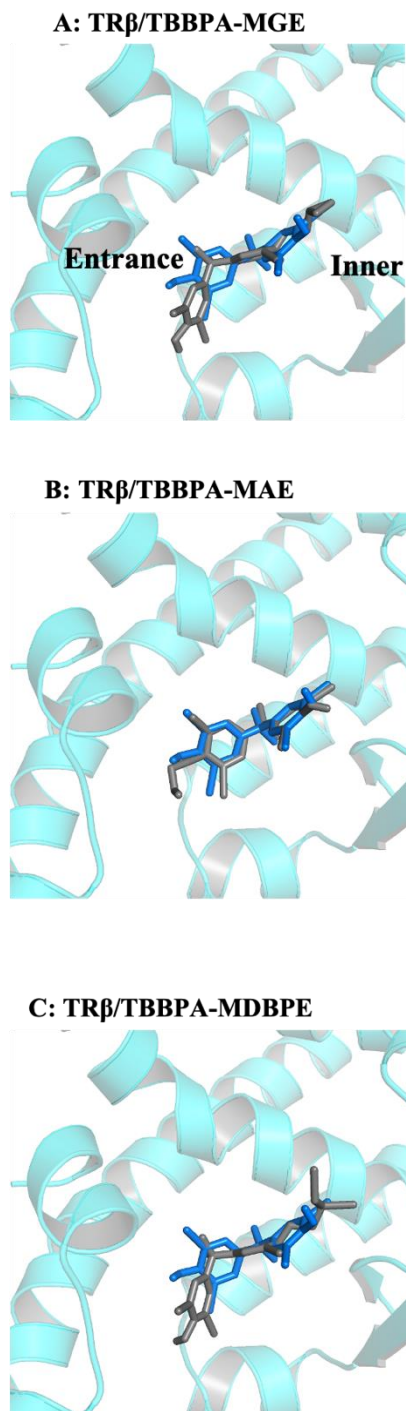

**Figure S5.** Overlay of the binding modes of the tetrabromobisphenol A (TBBPA) mono-ether structural analogs [TBBPA-mono(glycidyl ether) (TBBPA-MGE), TBBPA-mono(allyl ether) (TBBPA-MAE) and TBBPA-mono(2,3-dibromopropyl ether) (TBBPA-MDBPE)] with TBBPA in human thyroid hormone receptor  $\beta$ -ligand binding domain (TR $\beta$ -LBD). The protein is shown in green. TBBPA is shown in blue. TBBPA mono-ether structural analogs are shown in gray.



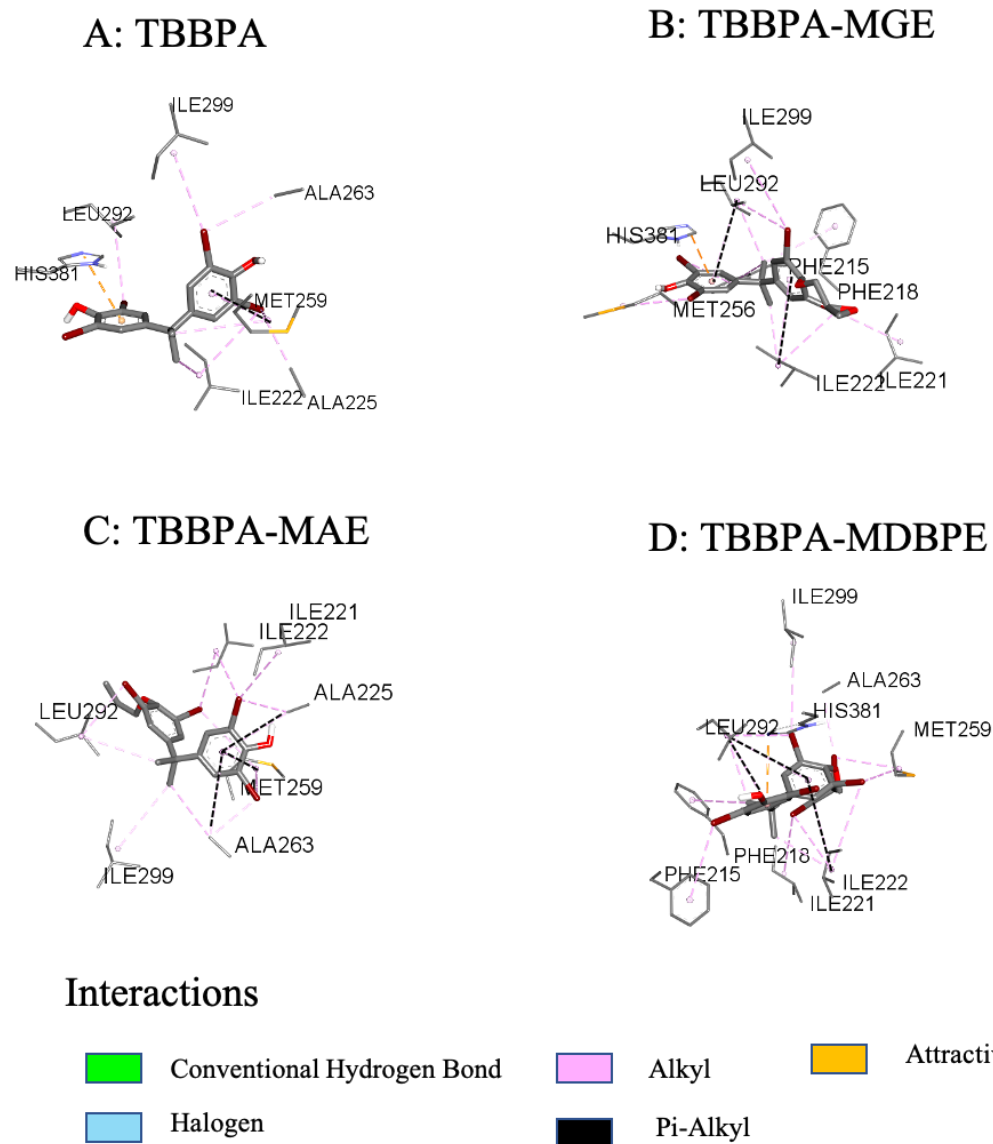

**Figure S6.** The interactions of tetrabromobisphenol A (TBBPA) mono-ether structural analogs [TBBPA-mono(glycidyl ether) (TBBPA-MGE), TBBPA-mono(allyl ether) (TBBPA-MAE) and TBBPA-mono(2,3-dibromopropyl ether) (TBBPA-MDBPE)] and TBBPA with thyroid hormone receptor  $\alpha$ -ligand binding domain (TR $\alpha$ -LBD).

**A: TBBPA**

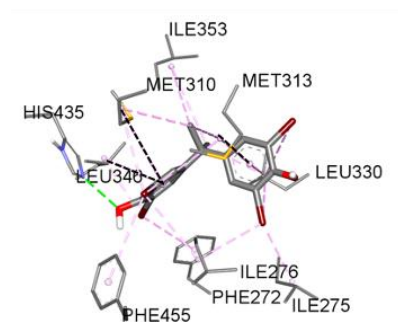

**B: TBBPA-MGE**

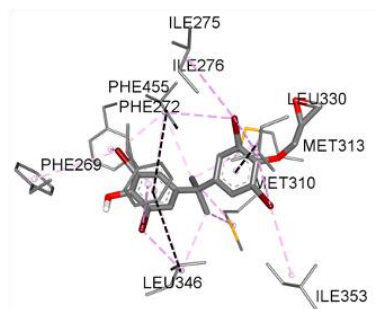

**C: TBBPA-MAE**

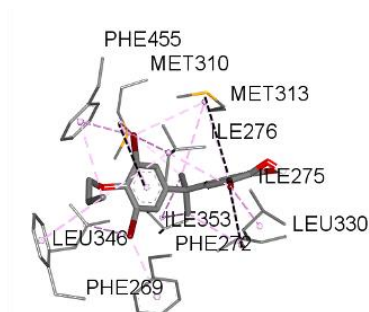

**D: TBBPA-MDBPE**

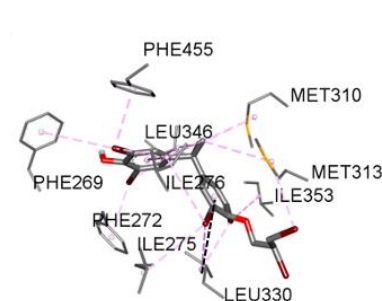

### Interactions

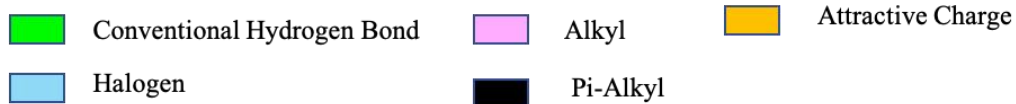

**Figure S7.** The interactions of tetrabromobisphenol A (TBBPA) mono-ether structural analogs [TBBPA-mono(glycidyl ether) (TBBPA-MGE), TBBPA-mono(allyl ether) (TBBPA-MAE) and TBBPA-mono(2,3-dibromopropyl ether) (TBBPA-MDBPE)] and TBBPA with thyroid hormone receptor  $\beta$ -ligand binding domain (TR $\beta$ -LBD).

**Table S1.** Summary data for Figure S1. “SD” means standard deviation of three replicates.

|                       |                           |       |  |                       |                           |       |
|-----------------------|---------------------------|-------|--|-----------------------|---------------------------|-------|
| <b>A: TBBPA-MGE</b>   | mean absorbance at 450 nm | SD    |  | <b>E: TBBPA-BGE</b>   | mean absorbance at 450 nm | SD    |
| 0 $\mu$ M             | 0.251                     | 0.020 |  | 0 $\mu$ M             | 0.245                     | 0.005 |
| 0.3 $\mu$ M           | 0.263                     | 0.006 |  | 0.3 $\mu$ M           | 0.242                     | 0.014 |
| 0.6 $\mu$ M           | 0.270                     | 0.011 |  | 0.6 $\mu$ M           | 0.233                     | 0.011 |
| 1.2 $\mu$ M           | 0.277                     | 0.017 |  | 1.2 $\mu$ M           | 0.238                     | 0.013 |
| 2.5 $\mu$ M           | 0.317                     | 0.034 |  | 2.5 $\mu$ M           | 0.258                     | 0.020 |
| 5 $\mu$ M             | 0.456                     | 0.093 |  | 5 $\mu$ M             | 0.308                     | 0.011 |
| 10 $\mu$ M            | 0.626                     | 0.040 |  | 10 $\mu$ M            | 0.112                     | 0.003 |
| <b>B: TBBPA-MAE</b>   | mean absorbance at 450 nm | SD    |  | <b>F: TBBPA-BAE</b>   | mean absorbance at 450 nm | SD    |
| 0 $\mu$ M             | 0.234                     | 0.009 |  | 0 $\mu$ M             | 0.240                     | 0.010 |
| 0.3 $\mu$ M           | 0.272                     | 0.007 |  | 0.3 $\mu$ M           | 0.243                     | 0.012 |
| 0.6 $\mu$ M           | 0.278                     | 0.012 |  | 0.6 $\mu$ M           | 0.234                     | 0.018 |
| 1.2 $\mu$ M           | 0.311                     | 0.012 |  | 1.2 $\mu$ M           | 0.222                     | 0.012 |
| 2.5 $\mu$ M           | 0.384                     | 0.037 |  | 2.5 $\mu$ M           | 0.258                     | 0.034 |
| 5 $\mu$ M             | 0.571                     | 0.011 |  | 5 $\mu$ M             | 0.279                     | 0.017 |
| 10 $\mu$ M            | 0.590                     | 0.010 |  | 10 $\mu$ M            | 0.281                     | 0.010 |
| <b>C: TBBPA-MDBPE</b> | mean absorbance at 450 nm | SD    |  | <b>G: TBBPA-BDBPE</b> | mean absorbance at 450 nm | SD    |
| 0 $\mu$ M             | 0.235                     | 0.007 |  | 0 $\mu$ M             | 0.232                     | 0.006 |
| 0.3 $\mu$ M           | 0.513                     | 0.027 |  | 0.3 $\mu$ M           | 0.252                     | 0.005 |
| 0.6 $\mu$ M           | 0.725                     | 0.006 |  | 0.6 $\mu$ M           | 0.260                     | 0.028 |
| 1.2 $\mu$ M           | 0.971                     | 0.025 |  | 1.2 $\mu$ M           | 0.256                     | 0.014 |
| 2.5 $\mu$ M           | 1.091                     | 0.044 |  | 2.5 $\mu$ M           | 0.244                     | 0.024 |
| 5 $\mu$ M             | 0.242                     | 0.009 |  | 5 $\mu$ M             | 0.257                     | 0.008 |
| 10 $\mu$ M            | 0.101                     | 0.001 |  | 10 $\mu$ M            | 0.276                     | 0.008 |
| <b>D: TBBPA</b>       | mean absorbance at 450 nm | SD    |  |                       |                           |       |
| 0 $\mu$ M             | 0.238                     | 0.015 |  |                       |                           |       |
| 0.3 $\mu$ M           | 0.244                     | 0.008 |  |                       |                           |       |
| 0.6 $\mu$ M           | 0.259                     | 0.006 |  |                       |                           |       |
| 1.2 $\mu$ M           | 0.261                     | 0.005 |  |                       |                           |       |
| 2.5 $\mu$ M           | 0.272                     | 0.009 |  |                       |                           |       |
| 5 $\mu$ M             | 0.294                     | 0.017 |  |                       |                           |       |
| 10 $\mu$ M            | 0.352                     | 0.012 |  |                       |                           |       |

**Table S2.** Summary data for Figure 2. “RBP” means relative binding potency. “SD” means standard deviation of three replicates.

|                       |          |     |  |                       |          |     |
|-----------------------|----------|-----|--|-----------------------|----------|-----|
| <b>A: TBBPA-MGE</b>   | mean RBP | SD  |  | <b>E: TBBPA-BGE</b>   | mean RBP | SD  |
| 0 nM                  | 100.0    | 0.3 |  | 0 nM                  | 100.0    | 0.8 |
| 5 nM                  | 99.0     | 0.3 |  | 5 nM                  | 98.5     | 0.9 |
| 50 nM                 | 97.6     | 0.5 |  | 50 nM                 | 94.9     | 1.6 |
| 500 nM                | 57.3     | 2.2 |  | 500 nM                | 88.2     | 1.7 |
| 5000 nM               | 13.7     | 0.5 |  | 5000 nM               | 72.2     | 1.4 |
| 50000 nM              | 25.5     | 3.0 |  | 50000 nM              | 63.5     | 1.3 |
|                       |          |     |  |                       |          |     |
| <b>B: TBBPA-MAE</b>   | mean RBP | SD  |  | <b>F: TBBPA-BAE</b>   | mean RBP | SD  |
| 0 nM                  | 100.0    | 0.3 |  | 0 nM                  | 100.0    | 0.6 |
| 5 nM                  | 95.5     | 0.9 |  | 5 nM                  | 98.4     | 0.5 |
| 50 nM                 | 91.8     | 0.3 |  | 50 nM                 | 97.6     | 0.5 |
| 500 nM                | 1.8      | 1.7 |  | 500 nM                | 97.1     | 0.3 |
| 5000 nM               | 16.8     | 0.7 |  | 5000 nM               | 97.3     | 0.6 |
| 50000 nM              | 16.6     | 3.7 |  | 50000 nM              | 88.2     | 0.5 |
|                       |          |     |  |                       |          |     |
| <b>C: TBBPA-MDBPE</b> | mean RBP | SD  |  | <b>G: TBBPA-BDBPE</b> | mean RBP | SD  |
| 0 nM                  | 100.0    | 0.7 |  | 0 nM                  | 100.0    | 0.5 |
| 5 nM                  | 97.9     | 0.7 |  | 5 nM                  | 99.3     | 0.4 |
| 50 nM                 | 97.4     | 0.4 |  | 50 nM                 | 99.0     | 0.2 |
| 500 nM                | 85.8     | 0.8 |  | 500 nM                | 99.6     | 0.2 |
| 5000 nM               | 13.2     | 1.5 |  | 5000 nM               | 98.6     | 0.6 |
| 50000 nM              | 12.1     | 0.9 |  | 50000 nM              | 90.3     | 0.4 |
|                       |          |     |  |                       |          |     |
| <b>D: TBBPA</b>       | mean RBP | SD  |  |                       |          |     |
| 0 nM                  | 100.0    | 0.5 |  |                       |          |     |
| 5 nM                  | 97.8     | 0.2 |  |                       |          |     |
| 50 nM                 | 93.0     | 0.2 |  |                       |          |     |
| 500 nM                | 29.2     | 0.7 |  |                       |          |     |
| 5000 nM               | 4.8      | 0.9 |  |                       |          |     |
| 50000 nM              | 10.7     | 1.7 |  |                       |          |     |

**Table S3.** Summary data for Figure S2. “RBP” means relative binding potency. “SD” means standard deviation of three replicates.

|                       |          |     |  |                       |          |     |
|-----------------------|----------|-----|--|-----------------------|----------|-----|
| <b>A: TBBPA-MGE</b>   | mean RBP | SD  |  | <b>E: TBBPA-BGE</b>   | mean RBP | SD  |
| 0 nM                  | 100.0    | 2.1 |  | 0 nM                  | 100.0    | 1.8 |
| 5 nM                  | 100.2    | 1.1 |  | 5 nM                  | 101.6    | 0.6 |
| 50 nM                 | 100.7    | 1.8 |  | 50 nM                 | 102.3    | 0.4 |
| 500 nM                | 101.8    | 0.5 |  | 500 nM                | 101.6    | 0.5 |
| 5000 nM               | 99.7     | 1.9 |  | 5000 nM               | 101.1    | 0.6 |
| 50000 nM              | 95.9     | 1.9 |  | 50000 nM              | 97.9     | 0.9 |
|                       |          |     |  |                       |          |     |
| <b>B: TBBPA-MAE</b>   | mean RBP | SD  |  | <b>F: TBBPA-BAE</b>   | mean RBP | SD  |
| 0 nM                  | 100.0    | 0.5 |  | 0 nM                  | 100.0    | 0.4 |
| 5 nM                  | 99.0     | 0.3 |  | 5 nM                  | 100.9    | 1.0 |
| 50 nM                 | 100.3    | 0.4 |  | 50 nM                 | 101.5    | 0.9 |
| 500 nM                | 96.5     | 0.5 |  | 500 nM                | 101.4    | 0.3 |
| 5000 nM               | 99.7     | 0.8 |  | 5000 nM               | 101.1    | 0.3 |
| 50000 nM              | 97.9     | 0.4 |  | 50000 nM              | 97.1     | 1.0 |
|                       |          |     |  |                       |          |     |
| <b>C: TBBPA-MDBPE</b> | mean RBP | SD  |  | <b>G: TBBPA-BDBPE</b> | mean RBP | SD  |
| 0 nM                  | 100.0    | 1.0 |  | 0 nM                  | 100.0    | 1.8 |
| 5 nM                  | 100.1    | 0.4 |  | 5 nM                  | 98.1     | 0.6 |
| 50 nM                 | 102.1    | 0.5 |  | 50 nM                 | 98.2     | 0.9 |
| 500 nM                | 98.9     | 0.9 |  | 500 nM                | 96.9     | 1.3 |
| 5000 nM               | 99.4     | 1.1 |  | 5000 nM               | 96.3     | 0.9 |
| 50000 nM              | 100.2    | 0.5 |  | 50000 nM              | 94.3     | 0.9 |
|                       |          |     |  |                       |          |     |
| <b>D: TBBPA</b>       | mean RBP | SD  |  |                       |          |     |
| 0 nM                  | 100.0    | 0.8 |  |                       |          |     |
| 5 nM                  | 101.5    | 0.6 |  |                       |          |     |
| 50 nM                 | 100.7    | 0.6 |  |                       |          |     |
| 500 nM                | 101.9    | 0.3 |  |                       |          |     |
| 5000 nM               | 100.1    | 0.3 |  |                       |          |     |
| 50000 nM              | 94.2     | 1.3 |  |                       |          |     |

**Table S4.** The results of docking scores and interactions of tetrabromobisphenol A (TBBPA) mono-ether structural analogs [TBBPA-mono(glycidyl ether) (TBBPA-MGE), TBBPA-mono(allyl ether) (TBBPA-MAE) and TBBPA-mono(2,3-dibromopropyl ether) (TBBPA-MDBPE)] and TBBPA with transthyretin (TTR).

|                                            | <b>TBBPA</b>                                                                        | <b>TBBPA-MGE</b>                                                           | <b>TBBPA-MAE</b>                                                                   | <b>TBBPA-MDBPE</b>                                                                  |
|--------------------------------------------|-------------------------------------------------------------------------------------|----------------------------------------------------------------------------|------------------------------------------------------------------------------------|-------------------------------------------------------------------------------------|
| <b>Docking score</b>                       | 8.9                                                                                 | 8.7                                                                        | 9.1                                                                                | 8.6                                                                                 |
| <b>Hydrophobic interaction</b>             | (A): Leu 17, Ala 108, Leu 110, Val 121<br><br>(C): Lys 15, Leu 17, Ala 108, Leu 110 | (A): Leu 17, Ala 108, Leu 110<br><br>(C): Leu 17, Pro 24, Ala 108, Leu 110 | (A): Leu 17, Pro 24, Ala 108, Leu 110<br><br>(C): Lys 15, Leu 17, Ala 108, Leu 110 | (A): Lys 15, Leu 17, Ala 108, Leu 110<br><br>(C): Leu 17, Ala 108, Leu 110, Thr 119 |
| <b>Hydrogen bond interaction</b>           |                                                                                     | (C): Lys 15                                                                | (A): Lys 15                                                                        | (A): Ser 117                                                                        |
| <b><math>\pi</math>-cation interaction</b> | (A): Lys 15                                                                         |                                                                            |                                                                                    |                                                                                     |
| <b>Halogen interaction</b>                 | (A): Ser 117                                                                        | (A): Ser 117                                                               |                                                                                    |                                                                                     |

Note: The docking scores and the interactions between chemicals and TTR were obtained by flexible docking with AutoDock Vina. The higher docking score means higher potential binding potency between a chemical and TTR. (A): means the monomer A of TTR. (C): means the monomer C of TTR.

**Table S5.** Summary data for Figure 4. “RBP” means relative binding potency. “SD” means standard deviation of three replicates.

|                       |          |     |  |                       |          |     |
|-----------------------|----------|-----|--|-----------------------|----------|-----|
| <b>A: TBBPA-MGE</b>   | mean RBP | SD  |  | <b>E: TBBPA-BGE</b>   | mean RBP | SD  |
| 0 nM                  | 100.0    | 1.0 |  | 0 nM                  | 100.0    | 2.7 |
| 750 nM                | 98.2     | 2.4 |  | 750 nM                | 107.8    | 0.9 |
| 1500 nM               | 93.7     | 2.7 |  | 1500 nM               | 105.7    | 1.6 |
| 3000 nM               | 84.0     | 2.3 |  | 3000 nM               | 106.2    | 1.3 |
| 6000 nM               | 80.4     | 0.9 |  | 6000 nM               | 101.9    | 0.3 |
| 12500 nM              | 79.1     | 1.1 |  | 12500 nM              | 101.9    | 1.9 |
| 25000 nM              | 73.2     | 1.3 |  | 25000 nM              | 99.3     | 0.9 |
| 50000 nM              | 65.5     | 1.6 |  | 50000 nM              | 95.3     | 1.2 |
|                       |          |     |  |                       |          |     |
| <b>B: TBBPA-MAE</b>   | mean RBP | SD  |  | <b>F: TBBPA-BAE</b>   | mean RBP | SD  |
| 0 nM                  | 100.0    | 0.5 |  | 0 nM                  | 100.0    | 0.6 |
| 750 nM                | 89.5     | 0.3 |  | 750 nM                | 98.4     | 0.6 |
| 1500 nM               | 89.1     | 0.4 |  | 1500 nM               | 98.8     | 0.2 |
| 3000 nM               | 84.6     | 0.8 |  | 3000 nM               | 98.9     | 0.2 |
| 6000 nM               | 79.3     | 1.9 |  | 6000 nM               | 94.7     | 0.1 |
| 12500 nM              | 78.5     | 1.2 |  | 12500 nM              | 94.6     | 0.7 |
| 25000 nM              | 71.4     | 1.5 |  | 25000 nM              | 92.8     | 0.2 |
| 50000 nM              | 58.6     | 2.2 |  | 50000 nM              | 87.7     | 0.9 |
|                       |          |     |  |                       |          |     |
| <b>C: TBBPA-MDBPE</b> | mean RBP | SD  |  | <b>G: TBBPA-BDBPE</b> | mean RBP | SD  |
| 0 nM                  | 100.0    | 1.3 |  | 0 nM                  | 100.0    | 0.2 |
| 750 nM                | 96.7     | 0.3 |  | 750 nM                | 99.2     | 0.5 |
| 1500 nM               | 94.4     | 1.5 |  | 1500 nM               | 99.6     | 0.8 |
| 3000 nM               | 92.8     | 0.8 |  | 3000 nM               | 99.8     | 0.5 |
| 6000 nM               | 89.3     | 1.1 |  | 6000 nM               | 96.4     | 0.3 |
| 12500 nM              | 89.5     | 1.2 |  | 12500 nM              | 95.4     | 0.3 |
| 25000 nM              | 88.9     | 1.0 |  | 25000 nM              | 94.0     | 1.1 |
| 50000 nM              | 80.0     | 1.5 |  | 50000 nM              | 86.2     | 0.5 |
|                       |          |     |  |                       |          |     |
| <b>D: TBBPA</b>       | mean RBP | SD  |  |                       |          |     |
| 0 nM                  | 100.0    | 2.9 |  |                       |          |     |
| 750 nM                | 85.8     | 0.3 |  |                       |          |     |
| 1500 nM               | 81.5     | 0.4 |  |                       |          |     |
| 3000 nM               | 70.4     | 0.7 |  |                       |          |     |
| 6000 nM               | 60.5     | 1.0 |  |                       |          |     |
| 12500 nM              | 50.8     | 0.3 |  |                       |          |     |
| 25000 nM              | 43.2     | 1.1 |  |                       |          |     |
| 50000 nM              | 33.9     | 1.3 |  |                       |          |     |

**Table S6.** Summary data for Figure S4. “RBP” means relative binding potency. “SD” means standard deviation of three replicates.

|                       |          |     |  |                       |          |     |
|-----------------------|----------|-----|--|-----------------------|----------|-----|
| <b>A: TBBPA-MGE</b>   | mean RBP | SD  |  | <b>E: TBBPA-BGE</b>   | mean RBP | SD  |
| 0 nM                  | 100.0    | 0.6 |  | 0 nM                  | 100.0    | 1.6 |
| 750 nM                | 96.2     | 1.1 |  | 750 nM                | 100.7    | 0.5 |
| 1500 nM               | 94.5     | 0.2 |  | 1500 nM               | 90.5     | 2.4 |
| 3000 nM               | 80.9     | 1.9 |  | 3000 nM               | 89.2     | 4.3 |
| 6000 nM               | 77.7     | 0.9 |  | 6000 nM               | 93.5     | 1.3 |
| 12500 nM              | 70.5     | 1.7 |  | 12500 nM              | 89.1     | 1.0 |
| 25000 nM              | 65.9     | 1.9 |  | 25000 nM              | 86.1     | 0.8 |
| 50000 nM              | 50.6     | 1.8 |  | 50000 nM              | 81.4     | 0.8 |
|                       |          |     |  |                       |          |     |
| <b>B: TBBPA-MAE</b>   | mean RBP | SD  |  | <b>F: TBBPA-BAE</b>   | mean RBP | SD  |
| 0 nM                  | 100.0    | 0.8 |  | 0 nM                  | 100.0    | 0.6 |
| 750 nM                | 90.9     | 0.7 |  | 750 nM                | 99.6     | 0.8 |
| 1500 nM               | 87.6     | 0.1 |  | 1500 nM               | 93.5     | 1.4 |
| 3000 nM               | 79.4     | 1.2 |  | 3000 nM               | 94.5     | 1.8 |
| 6000 nM               | 79.0     | 1.3 |  | 6000 nM               | 84.7     | 0.7 |
| 12500 nM              | 64.8     | 3.7 |  | 12500 nM              | 83.8     | 1.3 |
| 25000 nM              | 59.5     | 1.9 |  | 25000 nM              | 82.9     | 1.6 |
| 50000 nM              | 48.0     | 1.6 |  | 50000 nM              | 75.5     | 1.6 |
|                       |          |     |  |                       |          |     |
| <b>C: TBBPA-MDBPE</b> | mean RBP | SD  |  | <b>G: TBBPA-BDBPE</b> | mean RBP | SD  |
| 0 nM                  | 100.0    | 0.6 |  | 0 nM                  | 100.0    | 2.0 |
| 750 nM                | 92.9     | 1.4 |  | 750 nM                | 100.7    | 1.1 |
| 1500 nM               | 93.1     | 1.0 |  | 1500 nM               | 103.5    | 0.7 |
| 3000 nM               | 89.6     | 0.5 |  | 3000 nM               | 98.8     | 0.7 |
| 6000 nM               | 85.9     | 1.5 |  | 6000 nM               | 103.8    | 1.4 |
| 12500 nM              | 85.9     | 1.0 |  | 12500 nM              | 96.4     | 0.4 |
| 25000 nM              | 81.1     | 1.2 |  | 25000 nM              | 94.0     | 0.2 |
| 50000 nM              | 69.8     | 1.3 |  | 50000 nM              | 88.3     | 1.2 |
|                       |          |     |  |                       |          |     |
| <b>D: TBBPA</b>       | mean RBP | SD  |  |                       |          |     |
| 0 nM                  | 100.0    | 0.9 |  |                       |          |     |
| 750 nM                | 95.0     | 0.5 |  |                       |          |     |
| 1500 nM               | 89.7     | 0.9 |  |                       |          |     |
| 3000 nM               | 85.5     | 0.1 |  |                       |          |     |
| 6000 nM               | 74.7     | 0.9 |  |                       |          |     |
| 12500 nM              | 66.7     | 0.2 |  |                       |          |     |
| 25000 nM              | 55.8     | 1.1 |  |                       |          |     |
| 50000 nM              | 34.9     | 1.7 |  |                       |          |     |



**Table S7.** The results of docking scores and interactions of tetrabromobisphenol A (TBBPA) mono-ether structural analogs [TBBPA-mono(glycidyl ether) (TBBPA-MGE), TBBPA-mono(allyl ether) (TBBPA-MAE) and TBBPA-mono(2,3-dibromopropyl ether) (TBBPA-MDBPE)] and TBBPA with thyroid hormone receptor  $\alpha$ -ligand binding domain (TR $\alpha$ -LBD).

|                                            | <b>TBBPA</b>                                         | <b>TBBPA-MGE</b>                                              | <b>TBBPA-MAE</b>                                              | <b>TBBPA-MDBPE</b>                                                             |
|--------------------------------------------|------------------------------------------------------|---------------------------------------------------------------|---------------------------------------------------------------|--------------------------------------------------------------------------------|
| <b>Docking score</b>                       | 10.1                                                 | 9.7                                                           | 9.9                                                           | 9.4                                                                            |
| <b>Hydrophobic interaction</b>             | Ile 222, Ala 225, Met 259, Ala 263, Leu 292, Ile 299 | Phe 215, Phe 218, Ile 221, Ile 222, Met 256, Leu 292, Ile 299 | Ile 221, Ile 222, Ala 225, Met 259 Ala 263, Leu 292, Ile 299; | Phe 215, Phe 218, Ile 221, Ile 222, Met 259 Ala 263, Leu 292, Ile 299, His 381 |
| <b><math>\pi</math>-cation interaction</b> | His 381                                              | His 381                                                       |                                                               |                                                                                |

Note: The docking scores and the interactions between chemicals and TR $\alpha$ -LBD were obtained by flexible docking with AutoDock Vina. The higher docking score means higher potential binding potency between a chemical and TR $\alpha$ -LBD.

**Table S8.** The results of docking scores and interactions of tetrabromobisphenol A (TBBPA) mono-ether structural analogs [TBBPA-mono(glycidyl ether) (TBBPA-MGE), TBBPA-mono(allyl ether) (TBBPA-MAE) and TBBPA-mono(2,3-dibromopropyl ether) (TBBPA-MDBPE)] and TBBPA with thyroid hormone receptor  $\beta$ -ligand binding domain (TR $\beta$ -LBD).

|                                  | <b>TBBPA</b>                                                           | <b>TBBPA-MGE</b>                                                                         | <b>TBBPA-MAE</b>                                                                         | <b>TBBPA-MDBPE</b>                                                                       |
|----------------------------------|------------------------------------------------------------------------|------------------------------------------------------------------------------------------|------------------------------------------------------------------------------------------|------------------------------------------------------------------------------------------|
| <b>Docking score</b>             | 9.8                                                                    | 9.0                                                                                      | 9.8                                                                                      | 8.9                                                                                      |
| <b>Hydrophobic interaction</b>   | Phe 272, Ile 275, Ile 276, Met 310, Met 313, Leu 330, Leu 346, Ile 353 | Phe 269, Phe 272, Ile 275, Ile 276, Met 310, Met 313, Leu 330, Leu 346, Ile 353, Phe 455 | Phe 269, Phe 272, Ile 275, Ile 276, Met 310, Met 313, Leu 330, Leu 346, Ile 353, Phe 455 | Phe 269, Phe 272, Ile 275, Ile 276, Met 310, Met 313, Leu 330, Leu 346, Ile 353, Phe 455 |
| <b>Hydrogen bond interaction</b> | His 435                                                                |                                                                                          |                                                                                          |                                                                                          |

Note: The docking scores and the interactions between chemicals and TR $\beta$ -LBD were obtained by flexible docking with AutoDock Vina. The higher docking score means higher potential binding potency between a chemical and TR $\beta$ -LBD.

**Table S9.** Summary data for Figure 5. “RCP” means relative cell proliferation compared with dimethyl sulfoxide control group. “SD” means standard deviation of three replicates.

|                       | Without amiodarone |      | With 2 $\mu$ M amiodarone |      |  |  | Without amiodarone    |          | With 2 $\mu$ M amiodarone |          |      |
|-----------------------|--------------------|------|---------------------------|------|--|--|-----------------------|----------|---------------------------|----------|------|
| <b>A: TBBPA-MGE</b>   | mean RCP           | SD   | mean RCP                  | SD   |  |  | <b>E: TBBPA-BGE</b>   | mean RCP | SD                        | mean RCP | SD   |
| 0 $\mu$ M             | 100.0              | 7.9  | 93.3                      | 4.0  |  |  | 0 $\mu$ M             | 100.0    | 2.2                       | 94.5     | 5.6  |
| 0.3 $\mu$ M           | 104.6              | 2.5  | 105.4                     | 2.7  |  |  | 0.3 $\mu$ M           | 98.7     | 6.0                       | 97.1     | 5.1  |
| 0.6 $\mu$ M           | 107.4              | 4.2  | 103.3                     | 1.1  |  |  | 0.6 $\mu$ M           | 95.2     | 4.6                       | 97.9     | 0.1  |
| 1.2 $\mu$ M           | 110.2              | 6.0  | 105.0                     | 8.4  |  |  | 1.2 $\mu$ M           | 97.0     | 5.3                       | 101.0    | 6.6  |
| 2.5 $\mu$ M           | 126.1              | 10.9 | 109.2                     | 7.6  |  |  | 2.5 $\mu$ M           | 105.5    | 7.8                       | 101.7    | 3.3  |
| 5 $\mu$ M             | 181.6              | 20.3 | 131.0                     | 11.7 |  |  | 5 $\mu$ M             | 125.9    | 3.6                       | 89.3     | 3.8  |
| 10 $\mu$ M            | 249.4              | 6.4  | 160.8                     | 8.3  |  |  | 10 $\mu$ M            | 45.7     | 2.8                       | 43.9     | 3.0  |
|                       |                    |      |                           |      |  |  |                       |          |                           |          |      |
| <b>B: TBBPA-MAE</b>   | mean RCP           | SD   | mean RCP                  | SD   |  |  | <b>F: TBBPA-BAE</b>   | mean RCP | SD                        | mean RCP | SD   |
| 0 $\mu$ M             | 100.0              | 3.9  | 93.0                      | 4.1  |  |  | 0 $\mu$ M             | 100.0    | 4.2                       | 98.2     | 1.8  |
| 0.3 $\mu$ M           | 116.5              | 2.7  | 107.0                     | 1.5  |  |  | 0.3 $\mu$ M           | 101.0    | 5.0                       | 102.4    | 2.6  |
| 0.6 $\mu$ M           | 118.9              | 4.3  | 103.9                     | 7.1  |  |  | 0.6 $\mu$ M           | 97.6     | 7.6                       | 92.9     | 7.7  |
| 1.2 $\mu$ M           | 132.9              | 4.0  | 114.1                     | 4.6  |  |  | 1.2 $\mu$ M           | 92.4     | 5.6                       | 99.6     | 10.4 |
| 2.5 $\mu$ M           | 164.2              | 9.6  | 116.7                     | 10.0 |  |  | 2.5 $\mu$ M           | 107.5    | 13.3                      | 95.7     | 10.4 |
| 5 $\mu$ M             | 244.1              | 2.0  | 146.6                     | 2.1  |  |  | 5 $\mu$ M             | 116.3    | 6.2                       | 105.9    | 12.4 |
| 10 $\mu$ M            | 252.6              | 1.7  | 60.2                      | 1.9  |  |  | 10 $\mu$ M            | 116.9    | 3.7                       | 105.7    | 6.9  |
|                       |                    |      |                           |      |  |  |                       |          |                           |          |      |
| <b>C: TBBPA-MDBPE</b> | mean RCP           | SD   | mean RCP                  | SD   |  |  | <b>G: TBBPA-BDBPE</b> | mean RCP | SD                        | mean RCP | SD   |
| 0 $\mu$ M             | 100.0              | 2.9  | 93.4                      | 7.1  |  |  | 0 $\mu$ M             | 100.0    | 2.7                       | 99.0     | 8.5  |
| 0.3 $\mu$ M           | 218.2              | 5.3  | 145.2                     | 7.1  |  |  | 0.3 $\mu$ M           | 108.5    | 1.9                       | 108.7    | 8.8  |
| 0.6 $\mu$ M           | 308.5              | 0.8  | 190.0                     | 6.9  |  |  | 0.6 $\mu$ M           | 111.8    | 10.6                      | 105.0    | 5.3  |
| 1.2 $\mu$ M           | 413.1              | 2.6  | 267.3                     | 3.2  |  |  | 1.2 $\mu$ M           | 110.2    | 5.5                       | 110.8    | 7.3  |
| 2.5 $\mu$ M           | 464.1              | 4.0  | 188.6                     | 10.3 |  |  | 2.5 $\mu$ M           | 104.9    | 10.0                      | 100.2    | 1.7  |
| 5 $\mu$ M             | 102.9              | 3.6  | 53.1                      | 1.9  |  |  | 5 $\mu$ M             | 110.6    | 3.1                       | 105.3    | 7.9  |
| 10 $\mu$ M            | 42.8               | 1.0  | 42.5                      | 1.9  |  |  | 10 $\mu$ M            | 118.8    | 2.9                       | 119.8    | 3.3  |
|                       |                    |      |                           |      |  |  |                       |          |                           |          |      |
| <b>D: TBBPA</b>       | mean RCP           | SD   | mean RCP                  | SD   |  |  |                       |          |                           |          |      |
| 0 $\mu$ M             | 100.0              | 6.1  | 94.6                      | 5.6  |  |  |                       |          |                           |          |      |
| 0.3 $\mu$ M           | 102.5              | 3.1  | 100.6                     | 3.6  |  |  |                       |          |                           |          |      |
| 0.6 $\mu$ M           | 108.9              | 2.1  | 102.4                     | 6.9  |  |  |                       |          |                           |          |      |
| 1.2 $\mu$ M           | 109.5              | 1.7  | 109.3                     | 4.6  |  |  |                       |          |                           |          |      |
| 2.5 $\mu$ M           | 114.4              | 3.2  | 111.8                     | 6.6  |  |  |                       |          |                           |          |      |
| 5 $\mu$ M             | 123.3              | 5.8  | 122.8                     | 2.8  |  |  |                       |          |                           |          |      |
| 10 $\mu$ M            | 147.9              | 3.5  | 129.6                     | 5.9  |  |  |                       |          |                           |          |      |

**Table S10.** Summary data for Figure 6. “RCP” means relative cell proliferation compared with dimethyl sulfoxide control group. “SD” means standard deviation of three replicates.

|                       |          |      |  |                       |          |      |
|-----------------------|----------|------|--|-----------------------|----------|------|
| <b>A: TBBPA-MGE</b>   | mean RCP | SD   |  | <b>E: TBBPA-BGE</b>   | mean RCP | SD   |
| 0 $\mu$ M             | 100.0    | 0.8  |  | 0 $\mu$ M             | 100.0    | 9.9  |
| 0.3 $\mu$ M           | 98.9     | 2.2  |  | 0.3 $\mu$ M           | 102.5    | 10.2 |
| 0.6 $\mu$ M           | 106.0    | 6.1  |  | 0.6 $\mu$ M           | 101.0    | 5.2  |
| 1.2 $\mu$ M           | 117.7    | 3.2  |  | 1.2 $\mu$ M           | 104.1    | 6.4  |
| 2.5 $\mu$ M           | 118.9    | 4.0  |  | 2.5 $\mu$ M           | 95.8     | 3.2  |
| 5 $\mu$ M             | 126.8    | 2.1  |  | 5 $\mu$ M             | 56.4     | 2.6  |
| 10 $\mu$ M            | 142.3    | 7.5  |  | 10 $\mu$ M            | 15.0     | 0.5  |
|                       |          |      |  |                       |          |      |
| <b>B: TBBPA-MAE</b>   | mean RCP | SD   |  | <b>F: TBBPA-BAE</b>   | mean RCP | SD   |
| 0 $\mu$ M             | 100.0    | 0.6  |  | 0 $\mu$ M             | 100.0    | 3.9  |
| 0.3 $\mu$ M           | 109.3    | 2.3  |  | 0.3 $\mu$ M           | 101.6    | 7.5  |
| 0.6 $\mu$ M           | 115.1    | 2.2  |  | 0.6 $\mu$ M           | 105.6    | 2.2  |
| 1.2 $\mu$ M           | 123.2    | 4.4  |  | 1.2 $\mu$ M           | 91.2     | 0.9  |
| 2.5 $\mu$ M           | 126.6    | 2.4  |  | 2.5 $\mu$ M           | 73.0     | 2.8  |
| 5 $\mu$ M             | 131.6    | 4.1  |  | 5 $\mu$ M             | 46.3     | 1.3  |
| 10 $\mu$ M            | 81.3     | 5.8  |  | 10 $\mu$ M            | 43.9     | 0.7  |
|                       |          |      |  |                       |          |      |
| <b>C: TBBPA-MDBPE</b> | mean RCP | SD   |  | <b>G: TBBPA-BDBPE</b> | mean RCP | SD   |
| 0 $\mu$ M             | 100.0    | 1.3  |  | 0 $\mu$ M             | 100.0    | 1.9  |
| 0.3 $\mu$ M           | 112.9    | 1.5  |  | 0.3 $\mu$ M           | 100.6    | 1.9  |
| 0.6 $\mu$ M           | 123.3    | 1.9  |  | 0.6 $\mu$ M           | 105.9    | 2.2  |
| 1.2 $\mu$ M           | 143.6    | 7.2  |  | 1.2 $\mu$ M           | 101.7    | 3.8  |
| 2.5 $\mu$ M           | 120.6    | 5.5  |  | 2.5 $\mu$ M           | 104.1    | 5.2  |
| 5 $\mu$ M             | 21.5     | 1.2  |  | 5 $\mu$ M             | 109.9    | 9.8  |
| 10 $\mu$ M            | 12.4     | 0.1  |  | 10 $\mu$ M            | 116.5    | 1.1  |
|                       |          |      |  |                       |          |      |
| <b>D: TBBPA</b>       | mean RCP | SD   |  |                       |          |      |
| 0 $\mu$ M             | 100.0    | 2.2  |  |                       |          |      |
| 0.3 $\mu$ M           | 101.9    | 2.8  |  |                       |          |      |
| 0.6 $\mu$ M           | 103.5    | 2.7  |  |                       |          |      |
| 1.2 $\mu$ M           | 105.9    | 3.9  |  |                       |          |      |
| 2.5 $\mu$ M           | 111.6    | 4.5  |  |                       |          |      |
| 5 $\mu$ M             | 112.6    | 2.1  |  |                       |          |      |
| 10 $\mu$ M            | 120.8    | 10.0 |  |                       |          |      |
